# Supplementary material for: Low-voltage, simple WO3-based electrochromic devices by directly incorporating an anodic species into the electrolyte
Source: Royal Society of Chemistry journal article supplement (doi:10.1039/c6tc03463b), 2016-01-01
Supplement: c6tc03463b1.pdf [file c6tc03463b1.pdf]

## Electronic Supplementary Information (ESI)

### Low-Voltage, Simple WO<sub>3</sub>-based Electrochromic Devices by Incorporating Anodic Species into the Electrolyte

*Jaehyun Bae,<sup>a</sup> Haekyoung Kim,<sup>b,\*</sup> Hong Chul Moon<sup>c,\*</sup> and Se Hyun Kim<sup>a,d,\*</sup>*

<sup>a</sup>Department of Advanced Organic Materials Engineering, Yeungnam University, Gyeongsan, North Gyeongsang 38541, South Korea

<sup>b</sup>School of Materials Science and Engineering, Yeungnam University, Gyeongsan, 38541, South Korea

<sup>c</sup>Department of Chemical Engineering, University of Seoul, Seoul 02504, South Korea

<sup>d</sup>School of Chemical Engineering, Yeungnam University, Gyeongsan, North Gyeongsang 38541, South Korea

\* Corresponding authors. E-mail: [hkim@ynu.ac.kr](mailto:hkim@ynu.ac.kr) (H.K.), [hcmoon@uos.ac.kr](mailto:hcmoon@uos.ac.kr) (H.C.M.), [shkim97@yu.ac.kr](mailto:shkim97@yu.ac.kr) (S.H.K.)

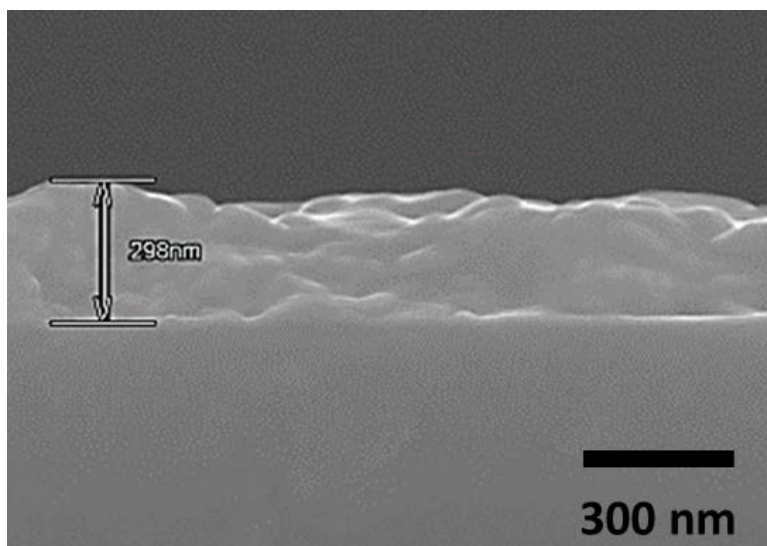

**Fig. S1** A cross-sectional SEM image of the prepared WO<sub>3</sub> film, in which a thickness of the film was determined as ~300 nm.

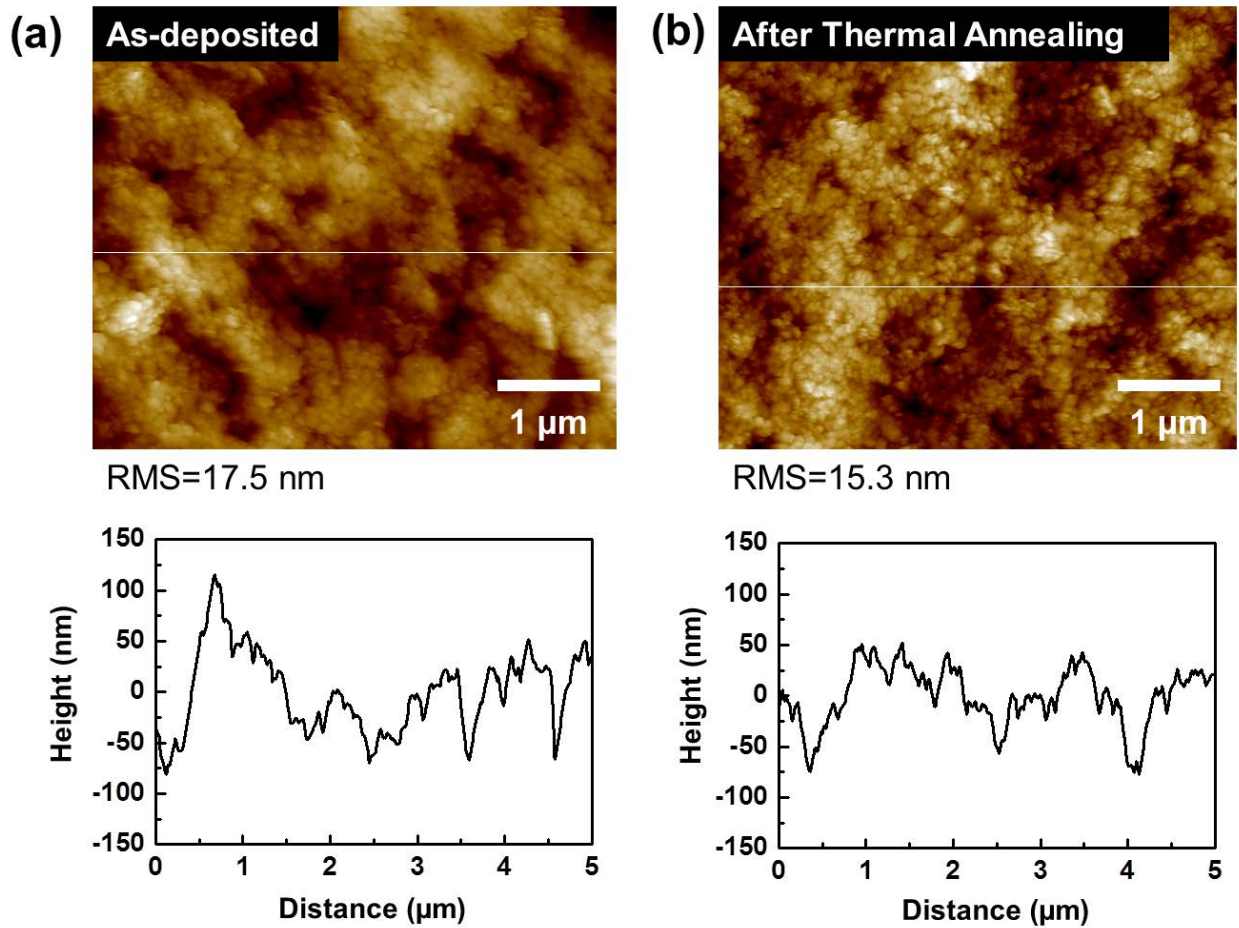

**Fig. S2** Tapping mode AFM images of the prepared  $\text{WO}_3$  film: (a) as-deposited, and (b) after thermal annealing at 60 °C in vacuum. The root-mean-square (rms) roughness of the film was characterized as 17.5 nm and 15.3 nm for the as-deposited and thermally treated film, respectively. Height profiles correspond to the white lines shown in AFM images.

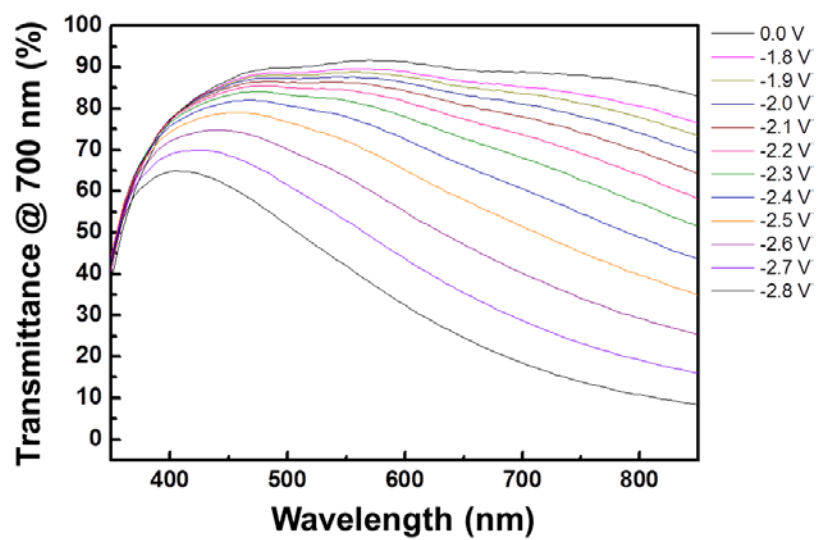

**Fig. S3** UV-vis spectra of the WO<sub>3</sub>-based ECD without Fc at various applied voltages, showing the absence of ferrocene resulted in higher coloration voltages.

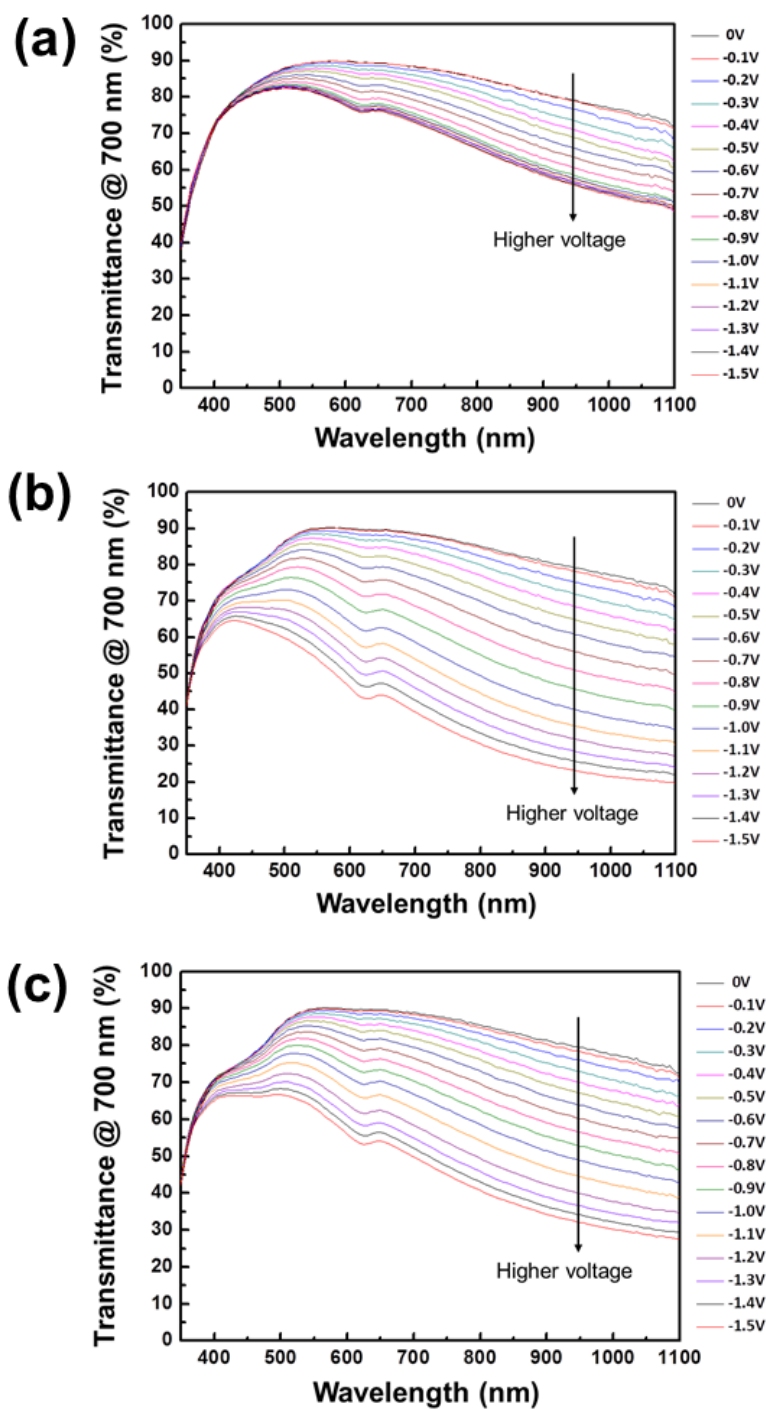

**Fig. S4** UV-vis spectra changes as a function of applied voltages at different Fc concentrations of (a) 0.01 M, (b) 0.05 M, and (c) 0.10 M. The lithium perchlorate ( $\text{LiClO}_4$ ) concentration was fixed at 0.50 M.
